# Supplementary material for: Change Mechanisms in Brief Interpersonal Psychotherapy for Women With Perinatal Depression: Qualitative Study
Source: Atypon-hosted journal article supplement (doi:10.1176/appi.psychotherapy.20200039), 2021-03-22
Supplement: appi.psychotherapy.20200039.ds001.pdf [file appi.psychotherapy.20200039.ds001.pdf]

### Qualitative Interview Questions for IPT-B Participants

Introduction: Thank you for taking the time to talk with me today. We're going to talk for about 30 minutes. Do you have some privacy right now? Is now a good time?

Orienting: We've already asked you a lot of questions over the 18 months you were in MOMCare. Now we want to just listen and give you the chance to talk about your important experiences with MOMCare. I'd really like you to tell me your opinions – both negative and positive. This will help us make MOMCare better. Shall we begin? Let's start by going back to when you first heard about the MOMCare study. It was [season] of [year], you were pregnant with [child's name], and going to Public Health in [city]. [PAUSE]

Question 1. Personal experiences with MOMCare:

1a. So, you were seeing [therapist's name], your MOMCare counselor at that time. Tell me about the help you got from her. How was it? How often did you talk to her? What did she help you with?

1b. Were there things you really liked about working with [therapist's name], your MOMCare counselor? What?

What was useful to you?

Tell me about a particular time or situation when [therapist's name] was helpful to you.

1c. Were there things that you didn't like about working with [therapist's name], or the MOMCare program? What?

Tell me about a particular time that was difficult or challenging working with [therapist's name], or the MOMCare program.

What things would you like MOMCare to do differently?

1d. [SUMMARIZE WHAT SHE LIKES & DISLIKES; WHAT SHE WOULD WANT MORE OR LESS OF] What are some ways you would make MOMCare better? [That's good...what else?]

Question 2. Other helpers:

2a. Who else did you talk to, or who helped you when you were feeling stressed during your pregnancy, and maybe after your baby was born? Did you talk to (1) someone at Public Health (social worker, nurse, nutritionist), (2) OB doctor or midwife, (3) counselor in the community, (4) anyone else?

2b. [PROBE EACH HELPER] Tell me about the help you got from [HELPER]. How was it? How often did you see [HELPER]? What did they help you with?

Question 3. Unique features of MOMCare:

3a. I know how busy you have been – so what made it possible for you to participate in MOMCare?

How did you manage to do it?

What made it difficult to participate in the sessions?

3b. Did you have most of your sessions over the phone or in person (probe: clinic, home, other)?

A. How was it having [therapist's name] call you? (Probe for comfort, flexibility,

ease, convenience, personal attention, cost-cell phone?) Probe for pros and cons.

B. How were the sessions that you had at the clinic? (Probe for comfort, flexibility, ease, convenience, personal attention, cost-transportation, child care) (If she doesn't remember having any sessions at the clinic, ask her what she would have thought about having sessions there.)

Question 4. Looking back to how you were feeling when you signed up for the study, how does that compare with how you're doing now?  
So why do you think [you feel better/worse/nothing has changed compared to how you feel] now?

Question 5. Endorsement of MOMCare  
If a friend wanted to know more about MOMCare, or was considering starting the program, what would you tell her?

Conclusion: Is there any other part of your experience with the study that you feel we haven't touched on?

Thank you so much. Your thoughts and feedback are very helpful! [CONFIRM ADDRESS FOR GIFT CARD].

### **Qualitative Interview Questions for MSS-Plus Participants**

Introduction: Thank you for taking the time to talk with me today. We're going to talk for about 30 minutes. Do you have some privacy right now? Is now a good time?

Orienting: We've already asked you a lot of questions over the 18 months you were in MOMCare. Now we want to just listen and give you the chance to talk about your important experiences with MOMCare. I'd really like you to tell me your opinions – both negative and positive. This will help us make MOMCare better. Shall we begin?  
Let's start by going back to when you first heard about the MOMCare study. It was [season] of [year], you were pregnant with [child's name], and going to Public Health in [city]. [PAUSE]

Question 1. Other helpers:  
MOMCare was supposed to connect you to help in the community, and to your doctor and Public Health.  
Did you talk to anyone (even if only once or twice), or did anyone help you when you were feeling stressed during your pregnancy, and maybe after your baby was born? Did you talk to (1) someone at Public Health (social worker, nurse, nutritionist), (2) your OB doctor or midwife, (3) a counselor in the community, (4) or anyone else?  
1a. [PROBE EACH HELPER] Tell me about the help you got from [HELPER]. How was it? How often did you see [HELPER]? What did they help you with?

Question 2. FOR THOSE WHO RECEIVED ANY KIND OF TREATMENT (counseling, medication, doctor, pastor, etc.): Tell me a little bit about that experience. (Probe for amount of treatment, did she finish a course of treatment? Did she stop going early? Why?)

2a. Were there things you really liked about the help you got? (What?)

How was it useful to you?

Tell me about a particular time or situation that was helpful to you.

2b. Were there things that you didn't like about the help you got? (What?)

Tell me about a particular time that was difficult or challenging about the program.

What things would you have liked to be different?

2c. I know how busy you have been – so what made it possible for you to go for help?

How did you manage to do it?

What made it difficult to go for help?

Question 3. FOR THOSE WHO DID NOT RECEIVE TREATMENT: Can you tell me a little bit about why you didn't go to see someone for help with stress and how you were feeling then? What got in the way? Were there other things you did, or things that happened, that helped you to feel better? [PROBE]

Question 4. Looking back to how you were feeling when you signed up for the study, how does that compare with how you're doing now?

So why do you think [you feel better/you feel worse/nothing has changed compared to how you feel] now?

Conclusion: Is there any other part of your experience with the study that you feel we haven't touched on?

Thank you so much. Your thoughts and feedback are very helpful! [CONFIRM ADDRESS FOR GIFT CARD].
